# Supplementary material
Source: ML conference proceedings conference paper supplement (https://proceedings.neurips.cc/paper_files/paper/2023/hash/7664a7e946a84ac5e97649a967717cf2-Abstract.html)
Supplement: Supplementary file 1 [file 7664a7e946a84ac5e97649a967717cf2-Supplemental-Conference.zip]

Archive with 2 entries (2 files):
- ConPreDiff-18-21.pdf
- __MACOSX/._ConPreDiff-18-21.pdf
